# Neural and non-neural contributions to sexual dimorphism of mid-day sleep in *Drosophila*: A pilot study

MOBINA KHERICHA, JAISON B. KOLENCHERY, ERAN TAUBER

Department of Genetics, University of Leicester, Leicester, U. K.

Correspondence: Dr Eran Tauber, Department of Genetics, University of Leicester, Leicester, LE1 7RH, U. K. Tel.: +44 (0)116 252 3455; e-mail: et22@le.ac.uk

**Keywords:** sleep, sexual dimorphism, *Drosophila*, *transformer*, fat body, *takeout*

## Abstract

Many of the characteristics associated with mammalian sleep are also observed in *Drosophila*, making the fruit-fly a powerful model organism for studying the genetics of this important process. Among these similarities is the presence of sexual dimorphic sleep patterns, which in flies, is manifested as increased mid-day sleep ('siesta') in males, compared to females. Here, we have used targeted miss-expression of the gene *transformer* (*tra*) and *tra2* to either feminise or masculinise specific neural and non-neural tissues in the fly. Feminization of males using three different GAL4 drivers which are expressed in the mushroom bodies induced a female-like reduced siesta, while the masculinisation of females using these drivers triggered the male-like increased siesta. We also observed a similar reversal of sex-specific sleep by miss-expressing *tra* in the fat body, a key tissue in energy metabolism and hormone secretion. In addition, the daily expression levels of *takeout*, an important circadian clock output gene, were sexually dimorphic. Taken together, our experiments suggest that sleep-sexual dimorphism in *Drosophila* is driven by multiple neural and non-neural circuits, within and outside the brain.

Keywords: *Drosophila*, Sleep, sexual dimorphism. *takeout*, fat body, mushroom body, *transformer*

## Introduction

Studies in various organisms have shown that various sleep properties are gender specific. In humans for example, the frequency of sleep spindles (a burst of oscillatory neural activity during stage N2 sleep) is elevated in women compared with men (Gaillard & Blois, 1981). In addition, women sleep longer, when deprived from external cues under lab conditions (Wever, 1984), and slow wave sleep (SWS) is more frequent in women than in men (Reynolds *et al.*, 1990). Sex difference in sleep patterns is also present in mice (Sinton *et al.*, 1981; Paul *et al.*, 2006) and rats (Fang & Fishbein 1996).

Similar to mammals, the pattern of sleep in *Drosophila* is also sexually dimorphic, with a pronounced mid-day sleep ('siesta') in males, but not in females (Andretic & Shaw, 2005; Ho & Sehgal, 2005). In addition, the fly response to sleep deprivation has also been studied (Hendricks *et al.*, 2003; Shaw *et al.*, 2002), although gender dimorphic differences have been observed only in the circadian clock mutant cycle (aka *Bmall*). Female mutants have a pronounced rest rebound, whereas in males the homeostatic response is reduced or non-existing.

A recent study (Catterson *et al.*, 2010) has shown that diet has a major impact on sleep patterns, in a way which was also sex-dependant. Males fed with dietary yeast extracts showed increased locomotor activity and shorten diurnal and nocturnal sleep, while females responded to this diet with reduced daytime locomotor activity and a more fragmented nocturnal sleep. The reduced mid-day sleep in females has been associated mainly with inseminated females (Isaac *et al.*, 2010), which has led to the suggestion that the sex-peptide, a male seminal peptide transferred during copulation, modulates the female behaviour and promotes their mid-day waking.

Sex determination in *Drosophila* has been extensively studied (Schutt & Nothiger, 2000) and genetic tools are available, allowing manipulation of specific target tissues. The *transformer (tra)* gene is a

66 key gene in the cascade responsible for somatic sexual differentiation. In females, splicing of *tra*  
67 (mediated by SXL) generates TRA protein that activates the female sexual differentiation. In males,  
68 the *tra* pre-mRNA is spliced into its male-specific form, which translates into a truncated inactive  
69 protein, consequently leading to male sexual differentiation. Ectopic expression of the female form of  
70 *tra* RNA causes chromosomal males to develop as females (McKeown *et al.*, 1988). The UAS-GAL4  
71 binary system in *Drosophila* (Brand & Perrimon, 1993) allows the expression of the female spliced  
72 form of *tra* in targeted cells in a male, inducing a female pattern of development; strains with a  
73 GAL4 transgene expressed in a defined set of cells are crossed to those carrying the female-specific  
74 *tra<sup>F</sup>* fused to upstream activating sequence (UAS-*tra*). This leads to activation of *tra* in all the tissues  
75 expressing GAL4, creating tissue-specific feminization (Ferveur *et al.*, 1995; Ferveur *et al.*, 1997). A  
76 similar approach has also been used to masculinise female specific tissues, using a *tra2* RNA  
77 interfering construct (UAS-*tra2*-IR) (Lazareva *et al.*, 2007). Here, we have used the UAS-GAL4  
78 system to feminize male specific regions of the brain and masculinise female specific neurons, trying  
79 to identify the sleep circuits that may be controlling this sexually dimorphic behaviour in flies.

## 80 **Materials and Methods**

### 81 *Fly strains*

82 To feminise males, the strain *w*; UAS-*tra*<sup>F</sup> from the Bloomington Drosophila Stock Centre at Indiana  
83 University (stock number 4590) was used. For female masculinisation, we used a transgenic strain  
84 carrying dsRNAi construct targeting *tra2*, (UAS-*tra2*-IR), which was obtained from Vienna  
85 Drosophila RNAi Centre (stock v8868). Another strain targeting UAS-*tra* also has been used (stock  
86 v2560), but preliminary tests indicated that mid-day sleep females UAS-*tra*-IR is unusually high, and  
87 therefore not useful for testing female masculinisation. UAS-*dicer2* transgenic strain (stock v60008)  
88 was used to enhance the efficiency of RNAi in some crosses (specified when used).

89 Four GAL4 enhancer-trap strains, 103Y, 30Y, 121Y (Gatti *et al.*, 2000) and Voila-GAL4 (Balakireva  
90 *et al.*, 1998) driving expression in the mushroom bodies (MB), central complex and a small cluster in  
91 pars intercerebralis (PI) were a gift from Jean-François Ferveur at the University of Dijon .

92 Additional GAL4 strains were obtained from Bloomington Stock Centre included the pan neural  
93 *w*; *elav*-GAL4 (stock 8760), and *w*;1471-GAL4 strain with expression patterns in the  $\gamma$  lobes of MB  
94 (stock 9465). *takeout(to)*-GAL4 driving expression in the fat body as well as in a subset of cells  
95 within the maxillary palps and antennae (Dauwalder *et al.*, 2002) was a gift from Brigitte Dauwalder  
96 at the University of Houston.

97 Each of the strains above was also crossed to *w*<sup>1118</sup> and their F1 progeny were used as two controls  
98 (UAS and GAL4) compared to the phenotype of flies carrying the both transgenes. All stocks and  
99 experimental crosses were maintained at 25°C with a Light:Dark (LD) 12:12 h, and kept on standard  
100 cornmeal/sugar-based food.

# 101 *Sleep assay*

102 The sleep/wake pattern of flies aged 3-4 days was monitored using the Drosophila Activity  
 103 Monitoring System (DAMS, TriKinetics) at 25°C in LD 12:12 h, for a total of 4 days. Only virgin  
 104 females were used in all experiments. Data was collected in five- min bins, and sleep was quantified  
 105 by summing consecutive bins for which no activity was recorded, using the R software (R  
 106 Development Core Team, 2010). Since the mid-day 'Siesta' sleep time interval varied among strains  
 107 (typically, between 5-8 h after light on), we quantified the daily average sleep during 2 h around noon  
 108 (5-7 h after lights on). This has simplified the algorithm and ensured the capture of mid-day sleep. In  
 109 the feminizing experiments, where the female-spliced form of *tra* was expressed in males, siesta  
 110 sleep was calculated both in the feminized males and in females, and compared to their background  
 111 controls. Similarly, in masculinisation of the females, RNAi constructs of *tra* and *tra2* were  
 112 expressed in females, and siesta sleep was assessed in males and masculinised females, and  
 113 compared to their background controls. In each experiment, the sleep scores of the three genotypes  
 114 were compared by Kruskal-Wallis ANOVA. Tests indicating significant difference were followed by  
 115 the Siegel-Castellan non-parametric post-hoc test (Siegel & Castellen, 1988,pp.213-214), comparing  
 116 each of the control to the GAL4/UAS genotype. Statistical tests were carried with the *pgirmess*  
 117 library implemented in the statistical software “R” (R Development Core Team, 2010).

# 118 *RNA Quantification*

119 The mRNA levels of *to* were assayed by qPCR. We analysed males, virgin females and mated  
 120 females, 4-5 days old. Flies were maintained at 25°C in a 12-h LD cycle for 5 days. On the sixth day  
 121 the files were collected at two different time points, immediately after lights on (Zt0), and 6 h after  
 122 lights off (Zt6). Total RNA was isolated from male fly heads using TRIZOL (Invitrogen). Five  
 123 hundred ng of total RNA was used for cDNA synthesis, which was carried with the Affinity Script

kit (Stratagene). Oligo(dT) primers were used for the first strand synthesis. qPCR was carried using a SYBR Green assay (Agilent technology). The standard curve method was followed to quantify *to* mRNA, in 25  $\mu$ L reactions, with 0.3  $\mu$ M of final primer concentration. The forward primer was, 5'-GCCTTTTGGTCTCGGTGGAT-3'; reverse primer, 5'-TCCCCATTCTTCACCAGCG (amplicon size 142bp). *Ribosomal protein 49* mRNA (*rp49*) was used as the reference gene. The forward primer was, 5'-TTACAAGGAGACGGCCAAAG; the reverse primer, 5'-CTCTGCCCCACTTGAAGAGC.

## Results

All the transgenic strains used in this study exhibited a marked sexual dimorphic in mid-day sleep (Figs. S1-S5 in Supplementary Material), with males sleeping up to twice as much as females (males [mean $\pm$ SD]: 94  $\pm$  21, females: 42  $\pm$  24 min during 2 h at mid-day), similar to the previously reported sleep differences exhibited by wild-type Canton-S (Andreatic & Shaw, 2005; Ho & Sehgal, 2005).

We have tested the contribution of the mushroom bodies (MBs) to sexual dimorphic sleep using five different GAL4 drivers. The 121Y-GAL4 strain drives expression in the central complex (CC) and the MBs (Gatti *et al.*, 2000; Armstrong *et al.*, 1995). Using this driver for expressing UAS-*tra* (Fig. 1A) resulted in significantly reduced (feminised) male siesta sleep compared to control males carrying only a single transgene. Using this driver for knocking down *tra2* for masculinisation of the MBs induced siesta sleep in females, which was significantly higher than either of the single transgene controls (Fig. 1B). Note that the similar sleep level in females in the feminisation experiment (Fig. 1A) or the males in the masculinisation experiment (Fig. 1B) suggest that the response that we observe is not merely due to the interaction between the GAL4 and UAS genetic backgrounds.

The 30Y-GAL4 transgene is expressed in the MBs and the CC (Gatti *et al.*, 2000; Yang *et al.*, 1995). Feminisation of males using this driver induced a small, but significant, reduction of sleep compared to the UAS control ( $P < 0.01$ ), but not compared to the GAL4 control, which showed unusual reduced sleep (Fig. 2A). The effect of using this driver to masculinise females was stronger, and UAS-*tra2*-IR (Fig. 2B) resulted in siesta sleep in females that was comparable to that exhibited by males.

Using the 103Y-GAL4 line whose expression also extend to the MBs and CC (Tettamanti *et al.*, 1997) also induced reversal of siesta sleep; in males, sleep was reduced compared to the UAS control (but not compared with the GAL4 control, which showed non-typical low siesta, Fig. 3A). In females, brain masculinisation induced male-like siesta sleep (Fig. 3B). We observed a similar reversal of sleep using the 1471-GAL4 which is expressed in the  $\gamma$  lobes of MBs (Isabel *et al.*, 2004) (Fig.4). In contrast, using the *Voila*-GAL4 line, which is expressed in the MBs and the antennal lobes (Balakireva *et al.*, 1998), did not result in any significant change in sleep in either feminised males or masculinised females (Fig. S6 in Supplementary Material).

Interestingly, the *to*-GAL4 strain, which is expressed in the fat body (Dauwalder *et al.*, 2002) was also effective in reversing sleep (Fig. 5). While feminisation of males caused only small reduction of siesta sleep (compared with the UAS, but not with the GAL4 control), the masculinisation of females using the UAS-*tra2*-IR transgene induced a substantial increase in siesta sleep in females (Fig. 5), indicating a role for the fat body in sleep sexual dimorphism.

We have also analysed the transcript level of *to* during the beginning of the day (Zt0) and midday (Zt6) (Fig. 6). The expression of *to* was sexually dimorphic with a significant time-sex interaction ( $F_{1,10} = 4.99$ ,  $P < 0.05$ ). In both males and females, transcript level was relatively high at the beginning of the day and decline at midday as was previously reported (Benito *et al.*, 2010), but was



substantially higher in males at Zt0 (Fig. 6). Thus, sex-dependent differences in *to* expression at the beginning of the day may contribute to the differences in siesta sleep. Although RNA level converged to the same level at midday in males and females, there might be a time-lag between the mRNA and the protein profiles. This would lead to a different TO protein level between males and female just before siesta time (although previous studies suggested that this lag is rather small, So *et al.*, 2000; Benito *et al.*, 2010).

## Discussion

In this study we have focused on the MBs, which have been previously implicated as a key brain structure in sleep regulation (Joiner *et al.*, 2006; Pitman *et al.*, 2006). The role of the MB seems to be complex: preventing the MB output (either transiently, or by ablation) results in reduced sleep (Joiner *et al.*, 2006; Pitman *et al.*, 2006), but raising the activity of Go signalling in the MB enhances sleep (Guo *et al.*, 2011). This complexity has been evident in a recent study showing that Go signalling is present in two adjacent subtypes of MB cholinergic neurons that play opposite roles in sleep regulation (Yi *et al.*, 2013). Most parts of the MB are innervated by a single pair of neurons, the dorsal paired medial (DPM), which have recently shown to promote sleep (Haynes *et al.*, 2015). The mechanism involves inhibition of the MB  $\alpha'/\beta'$  neurons, by GABA release. The MB outputs converge onto a small subset of neurons (called MB output neurons, MBONs), whose role in sleep regulation has been recently studied in detail (Aso *et al.*, 2014). Glutamatergic MBONs were found to be sleep-suppressing while GABAergic or cholinergic neurons were sleep-promoting.

Four of the driver lines that we have tested, 121Y, 30Y, 103Y and Voila have been previously implicated in controlling a sexually dimorphic locomotion behaviour (Gatti *et al.*, 2000), with males exhibiting significantly shorter inter-bout intervals (and lower variation) than females. The overlap of the expression patterns of these GAL4 lines was restricted to a small cluster in the pars-intercerebralis

(PI), which was therefore suggested as a candidate for the location of that circuit. Here, however, the Voila driver did not have any effect on reversing sleep, while the driver *1471-GAL4* (not expressed in the PI) did (Fig. 4). Given that the overlap between these driver lines mainly consists of the MBs, which have recently been implicated in the regulation of sleep (Joiner *et al.*, 2006; Pitman *et al.*, 2006), it is likely that neurons in this centre also underlie the variations in siesta sleep. We do note however that in three of our feminisation experiments (Fig. 2A, 3A, & 4A) the experimental line did not differ significantly from the GAL4 driver, complicating our interpretation. Interestingly, males carrying these MB GAL4 driver showed unusual sleep, which may be the result of GAL4 accumulation in brain neurons as was previously reported (Rezaval *et al.*, 2007). Testing additional GAL4 drivers with more specific expression in the MBs, for example by using the split-GAL4 collection that has been recently created (Aso *et al.*, 2014), will aid identifying the neurons underlying sexual dimorphism. In addition, given that the PI has been shown to be important for sleep regulation (Foltényi *et al.*, 2007; Crocker *et al.*, 2010) further analysis using PI-specific drivers would help ruling out a role for this brain region in the sexual dimorphism. Future experiments would also benefit from backcrossing all GAL4 and UAS strains onto a uniform genetic background, which is rather important in sleep studies involving genetic screens (Axelrod *et al.*, 2015).

The use of GAL4 lines may be combined with the GAL80 enhancer traps, to repress the GAL4 expression, to drive feminization or masculinisation in a subset of cells of the drivers described here, refining the candidate regions (Suster *et al.*, 2004). This approach has been very successful in refining the brain neurons that constitute the circadian clock in *Drosophila* (Stoleru *et al.*, 2004).

Interestingly, the *to-GAL4* strain, which is expressed in the fat body (Dauwalder *et al.*, 2002) was also effective in reversing sleep (Fig. 5). *to* is also sparsely expressed in the antennae, but not in sex-specific manner (Dauwalder *et al.*, 2002), so this tissue is unlikely contributing to the sleep sexual dimorphism. Previous studies showed that *to* is under circadian control (Benito *et al.*, 2010) and is

involved in the regulation of feeding as well as adaptation to starvation (Meunier *et al.*, 2007; Sarov-Blat *et al.*, 2000). Thus, it is possible that the sleep sexual dimorphism is mediated by *to* (and the fat body) indirectly, so feminizing or masculinising the fat body changes the feeding status of the animal, and consequently its foraging behaviour. This idea fits well the recent studies that show a direct link between sleep pattern and feeding (Catterson *et al.*, 2010). Interestingly, in a recent study that analysed sleep behaviour in wild populations over a broad latitudinal range (Svetec *et al.*, 2015), *to* was identified as a strongly differentially expressed gene, suggesting that it is the target for natural selection.

The sexual dimorphism in sleep was also attributed to the egg-laying activity of females (Isaac *et al.*, 2010), which in flies is also under circadian-clock regulation (Sheeba *et al.*, 2001). Oviposition by itself, cannot explain the reduced mid-day sleep, since it peaks after dusk (Sheeba *et al.*, 2001), but females may need to be active during mid-day for acquiring nutrients for egg production, and these gender-specific metabolic constraints may underlying the sleep sexual dimorphism. However, in the current study only young virgin females have been used, so this excludes oviposition being a major factor for lack of siesta in females that we have observed (in all GAL4 and UAS strains, as well as Canton-S). This is also in apparent contradiction to Isaac *et al.* (2010) who reported that virgin females show male-like siesta, and switch to mid-day activity following mating because of the effect of the sex-peptides (SP) transferred by the males. However, the substantial higher day sleep in virgin females compared to males that we observed was also reported by others (Harbison *et al.*, 2009). The discrepancy between the studies may be due to the different strains used, but in general, other mechanisms in addition to the SP seem to contribute to the decreased mid-day sleep of females. These mechanisms may include both neural and non-neural circuits as suggested by the current work.

## Acknowledgment

We thank C.P. Kyriacou and E. Rosato for comments and suggestions that helped improve and clarify this manuscript and Mirko Pegoraro for his technical guidance. We are grateful to Brigitte Dauwalder, Jean-François Ferveur for sharing fly strains. This work was funded by grants from BBSRC BB/G02085X/1 to ET.

## References

- Andretic, R. & Shaw, P.J. (2005) Essentials of sleep recordings in *Drosophila*: moving beyond sleep time. *Methods in Enzymology*, **393**, 759-772.
- Armstrong, J.D., Kaiser, K., Muller, A., Fischbach, K.F., Merchant, N., & Strausfeld, N.J. (1995) Flybrain, an on-line atlas and database of the *Drosophila* nervous system. *Neuron*, **15**, 17-20.
- Aso, Y., Hattori, D., Yu, Y., Johnston, R.M., Iyer, N.A., Ngo, T.T., Dionne, H., *et al.* (2014) The neuronal architecture of the mushroom body provides a logic for associative learning. *Elife*, **3**, e04577.
- Aso, Y., Sitaraman, D., Ichinose, T., Kaun, K.R., Vogt, K., Belliart-Guerin, G., Placais, P.Y. *et al.* (2014) Mushroom body output neurons encode valence and guide memory-based action selection in *Drosophila*. *Elife*, **3**, e04580.
- Axelrod, S., Saez, L., & Young, M.W. (2015) Studying circadian rhythm and sleep using genetic screens in *Drosophila*. *Methods in Enzymology*, **551**, 3-27.

258 Balakireva, M., Stocker, R.F., Gendre, N., & Ferveur, J.F. (1998) Voila, a new *Drosophila* courtship  
259 variant that affects the nervous system: behavioral, neural, and genetic characterization.  
260 *Journal of Neuroscience*, **18**, 4335-4343.

261 Benito, J., Hoxha, V., Lama, C., Lazareva, A.A., Ferveur, J.F., Hardin, P.E., & Dauwalder, B. (2010)  
262 The circadian output gene *takeout* is regulated by *Pdp1ε*. *Proceedings of the National Academy*  
263 *of Sciences of the United States of America*, **107**, 2544-2549.

264 Brand, A.H. & Perrimon, N. (1993) Targeted gene expression as a means of altering cell fates and  
265 generating dominant phenotypes. *Development*, **118**, 401-15.

266 Catterson, J.H., Knowles-Barley, S., James, K., Heck, M.M., Harmar, A.J., & Hartley, P.S. (2010)  
267 Dietary modulation of *Drosophila* sleep-wake behaviour. *PLoS One*, **5**, e12062.

268 Crocker, A., Shahidullah, M., Levitan, I.B., & Sehgal, A. (2010) Identification of a neural circuit that  
269 underlies the effects of octopamine on sleep:wake behavior. *Neuron*, **65**, 670-681.

270 Dauwalder, B., Tsujimoto, S., Moss, J., & Mattox, W. (2002) The *Drosophila* *takeout* gene is  
271 regulated by the somatic sex-determination pathway and affects male courtship behavior.  
272 *Genes & Development*, **16**, 2879-2892.

273 Fang, J. & Fishbein, W. (1996) Sex differences in paradoxical sleep: influences of estrus cycle and  
274 ovariectomy. *Brain Research*, **734**, 275-285.

275 Ferveur, J.F., Stortkuhl, K.F., Stocker, R.F., & Greenspan, R.J. (1995) Genetic feminization of brain  
276 structures and changed sexual orientation in male *Drosophila*. *Science*, **267**, 902-905.

277 Ferveur, J.F., Savarit, F., O'Kane, C.J., Sureau, G., Greenspan, R.J., & Jallon, J.M. (1997) Genetic  
278 feminization of pheromones and its behavioral consequences in *Drosophila* males. *Science*,  
279 **276**, 1555-1558.

280 Foltenyi, K., Greenspan, R.J., & Newport, J.W. (2007) Activation of EGFR and ERK by rhomboid  
281 signaling regulates the consolidation and maintenance of sleep in *Drosophila*. *Nature*  
282 *Neuroscience*, **10**, 1160-1167.

283 Gaillard, J.M. & Blois, R. (1981) Spindle density in sleep of normal subjects. *Sleep*, **4**, 385-391.

284 Gatti, S., Ferveur, J.F., & Martin, J.R. (2000) Genetic identification of neurons controlling a sexually  
285 dimorphic behaviour. *Current Biology*, **10**, 667-670.

286 Guo, F., Yi, W., Zhou, M., & Guo, A. (2011) Go signaling in mushroom bodies regulates sleep in  
287 *Drosophila*. *Sleep*, **34**, 273-281.

288 Harbison, S.T., Carbone, M.A., Ayroles, J.F., Stone, E.A., Lyman, R.F., & Mackay, T.F. (2009) Co-  
289 regulated transcriptional networks contribute to natural genetic variation in *Drosophila* sleep.  
290 *Nature Genetics*, **41**, 371-375.

291 Haynes, P.R., Christmann, B.L., & Griffith, L.C. (2015) A single pair of neurons links sleep to  
292 memory consolidation in *Drosophila melanogaster*. *Elife*, **4**, 10.7554/eLife.03868.

293 Hendricks, J.C., Lu, S., Kume, K., Yin, J.C., Yang, Z., & Sehgal, A. (2003) Gender dimorphism in  
294 the role of cycle (BMAL1) in rest, rest regulation, and longevity in *Drosophila melanogaster*.  
295 *Journal of Biological Rhythms*, **18**, 12-25.

296 Ho, K.S. & Sehgal, A. (2005) *Drosophila melanogaster*: an insect model for fundamental studies of  
297 sleep. *Methods in Enzymology*, **393**, 772-793.

298 Isaac, R.E., Li, C., Leedale, A.E., & Shirras, A.D. (2010) *Drosophila* male sex peptide inhibits siesta  
299 sleep and promotes locomotor activity in the post-mated female. *Proceedings of the Royal*  
300 *Society B: Biological Sciences*, **277**, 65-70.

301 Isabel, G., Pascual, A., & Preat, T. (2004) Exclusive consolidated memory phases in *Drosophila*.  
302 *Science*, **304**, 1024-1027.

303 Joiner, W.J., Crocker, A., White, B.H., & Sehgal, A. (2006) Sleep in *Drosophila* is regulated by adult  
304 mushroom bodies. *Nature*, **441**, 757-760.

305 Lazareva, A.A., Roman, G., Mattox, W., Hardin, P.E., & Dauwalder, B. (2007) A role for the adult  
306 fat body in *Drosophila* male courtship behavior. *PLoS Genetics*, **3**, e16.

307 McKeown, M., Belote, J.M., & Boggs, R.T. (1988) Ectopic expression of the female transformer  
308 gene product leads to female differentiation of chromosomally male *Drosophila*. *Cell*, **53**, 887-  
309 895.

310 Meunier, N., Belgacem, Y.H., & Martin, J.R. (2007) Regulation of feeding behaviour and locomotor  
311 activity by takeout in *Drosophila*. *Journal of Experimental Biology*, **210**, 1424-1434.

312 Paul, K.N., Dugovic, C., Turek, F.W., & Laposky, A.D. (2006) Diurnal sex differences in the sleep-  
313 wake cycle of mice are dependent on gonadal function. *Sleep*, **29**, 1211-1223.

314 Pitman, J.L., McGill, J.J., Keegan, K.P., & Allada, R. (2006) A dynamic role for the mushroom  
315 bodies in promoting sleep in *Drosophila*. *Nature*, **441**, 753-756.

316 R Development Core Team (2010) R: A Language and Environment for Statistical Computing,  
317 2.10.1.

318 Reynolds, C.F.,3rd, Kupfer, D.J., Thase, M.E., Frank, E., Jarrett, D.B., Coble, P.A. *et al.* (1990)  
319 Sleep, gender, and depression: an analysis of gender effects on the electroencephalographic  
320 sleep of 302 depressed outpatients. *Biological Psychiatry*, **28**, 673-684.

321 Rezaval, C., Verbajh, S., & Ceriani, M.F. (2007) Neuronal death in *Drosophila* triggered by GAL4  
322 accumulation. *European Journal of Neuroscience*, **25**, 683-694.

323 Sarov-Blat, L., So, W.V., Liu, L., & Rosbash, M. (2000) The *Drosophila takeout* gene is a novel  
324 molecular link between circadian rhythms and feeding behavior. *Cell*, **101**, 647-56.

325 Schutt, C. & Nothiger, R. (2000) Structure, function and evolution of sex-determining systems in  
326 Dipteran insects. *Development*, **127**, 667-677.

327 Shaw, P.J., Tononi, G., Greenspan, R.J., & Robinson, D.F. (2002) Stress response genes protect  
328 against lethal effects of sleep deprivation in *Drosophila*. *Nature*, **417**, 287-291.

329 Sheeba, V., Chandrashekar, M.K., Joshi, A., & Kumar Sharma, V. (2001) A case for multiple  
330 oscillators controlling different circadian rhythms in *Drosophila melanogaster*. *Journal of*  
331 *Insect Physiology*, **47**, 1217-1225.

332 Siegel, S. & Castellan, N.J. Jr. (1988) *Nonparametric statistics for the behavioral sciences*. 2nd edn.  
333 New York: McGraw-Hill

334 Sinton, C.M., Valatx, J.L., & Jouvet, M. (1981) Increased sleep time in the offspring of caffeine-  
335 treated dams from two inbred strains of mice. *Neuroscience Letters*, **24**, 169-174.

336 So, W.V., Sarov-Blat, L., Kotarski, C.K., McDonald, M.J., Allada, R., & Rosbash, M. (2000)  
337 takeout, a novel *Drosophila* gene under circadian clock transcriptional regulation. *Molecular*  
338 *and Cellular Biology*, **20**, 6935-6944.



339 Stoleru, D., Peng, Y., Agosto, J., & Rosbash, M. (2004) Coupled oscillators control morning and  
340 evening locomotor behaviour of *Drosophila*. *Nature*, **431**, 862-8.

341 Suster, M.L., Seugnet, L., Bate, M., & Sokolowski, M.B. (2004) Refining GAL4-driven transgene  
342 expression in *Drosophila* with a GAL80 enhancer-trap. *Genesis*, **39**, 240-245.

343 Svetec, N., Zhao, L., Saelao, P., Chiu, J.C., & Begun, D.J. (2015) Evidence that natural selection  
344 maintains genetic variation for sleep in *Drosophila melanogaster*. *BMC Evolutionary Biology*,  
345 **15**, 41-015-0316-2.

346 Tettamanti, M., Armstrong, J.D., Endo, K., Yang, M.Y., Furukubo-Tokunaga, K., Kaiser, K., &  
347 Reichert, H. (1997) Early development of the *Drosophila* mushroom bodies, brain centres for  
348 associative learning and memory. *Development Genes and Evolution*, **207**, 242-252.

349 Wever, R.A. (1984) Properties of human sleep-wake cycles: parameters of internally synchronized  
350 free-running rhythms. *Sleep*, **7**, 27-51.

351 Yang, M.Y., Armstrong, J.D., Vilinsky, I., Strausfeld, N.J., & Kaiser, K. (1995) Subdivision of the  
352 *Drosophila* mushroom bodies by enhancer-trap expression patterns. *Neuron*, **15**, 45-54.

353 Yi, W., Zhang, Y., Tian, Y., Guo, J., Li, Y., & Guo, A. (2013) A subset of cholinergic mushroom  
354 body neurons requires Go signaling to regulate sleep in *Drosophila*. *Sleep*, **36**, 1809-1821.

355

## Figure legends

Fig. 1. Siesta sleep following feminsation and masculinisation of mushroom bodies. Box-plots showing siesta sleep in flies carrying 121Y-GAL4 driving (A) UAS-*tra* (feminsation of males), and (B) UAS-*tra2* (masculinisation of females). In each panel, the three left boxes show sleep in females, and the three right boxes (shaded grey) are for the males. The data shown in each panel represent siesta sleep for the GAL4/UAS genotypes (G4/U, white,  $n > 20$  for all GAL4 lines; males and females) and the single transgene control genotypes (GAL4/+, G4, light grey; UAS/+, U dark grey) for both sexes. Asterisks represent experimental genotype (GAL4/UAS) significance levels compared to control genotypes (GAL4/+ and UAS/+). Non-parametric post hoc tests were performed ( $*P < 0.05$ ,  $**P < 0.01$ ). The line within each box represents the median siesta sleep averaged over 4 days (in minutes), and the boxes extend to 25 and 75 percentiles. Note that significance differences are only tested for males in the feminisation experiments, or females in the masculinisation experiments.

369 **Fig. 2.** Feminsation and masculinisation of mushroom bodies using 30Y-GAL4. Box-plots showing  
 370 siesta sleep in flies carrying 30Y-GAL4 driving (A) UAS-*tra* (feminsation of males), and (B) UAS –  
 371 *tra2* (masculinisation of females). Plotting scheme same as in Fig. 1.

372 **Fig. 3.** Feminsation and masculinisation of mushroom bodies using 103Y-GAL4. Box-plots showing  
 373 siesta sleep in flies carrying 103Y-GAL4 driving (A) UAS-*tra* (feminsation of males), and (B) UAS  
 374 –*tra2* (masculinisation of females).Plotting scheme same as in Fig. 1.

375 **Fig. 4.** Feminsation and masculinisation of mushroom bodies using 1471-GAL4. Box-plots showing  
 376 siesta sleep in flies carrying 1471-GAL4 driving (A) UAS-*tra* (feminsation of males), and (B) UAS –  
 377 *tra2* (masculinisation of females).Plotting scheme same as in Fig. 1.

378 **Fig. 5.** Siesta sleep following feminisation and masculinisation of the fat body. The *takeout (to)* Gal4  
 379 driver was used for (A) feminsation of males using UAS-*tra*<sup>F</sup>, and (B) masculinisation of females  
 380 using UAS-*tra2*-IR. Plot parameters are as described in Figure 1.

381 **Fig. 6.** Sexual dimorphism in *takeout* expression. The relative mRNA expression of males (filled  
 382 circles) and females (open circles) is depicted for Zt0 and Zt6. Expression is normalised to reference  
 383 gene *rp49*. The error bars represent SE.

**Fig. 1.**

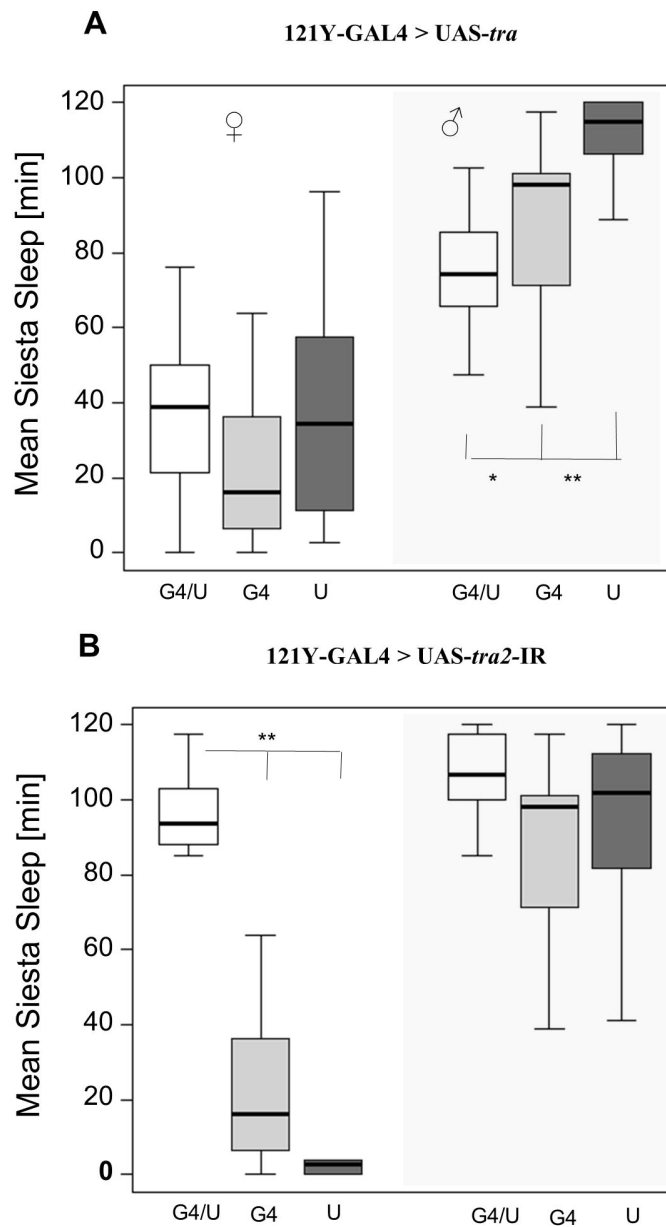

**Fig. 2.**

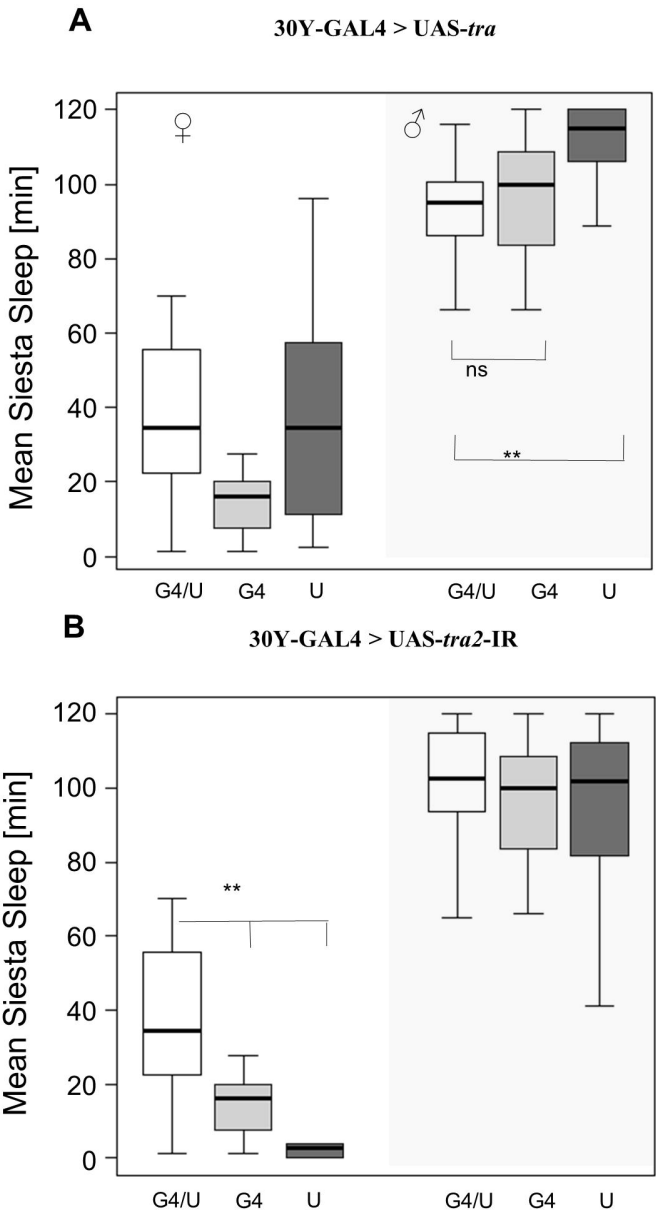

**Fig. 3.**

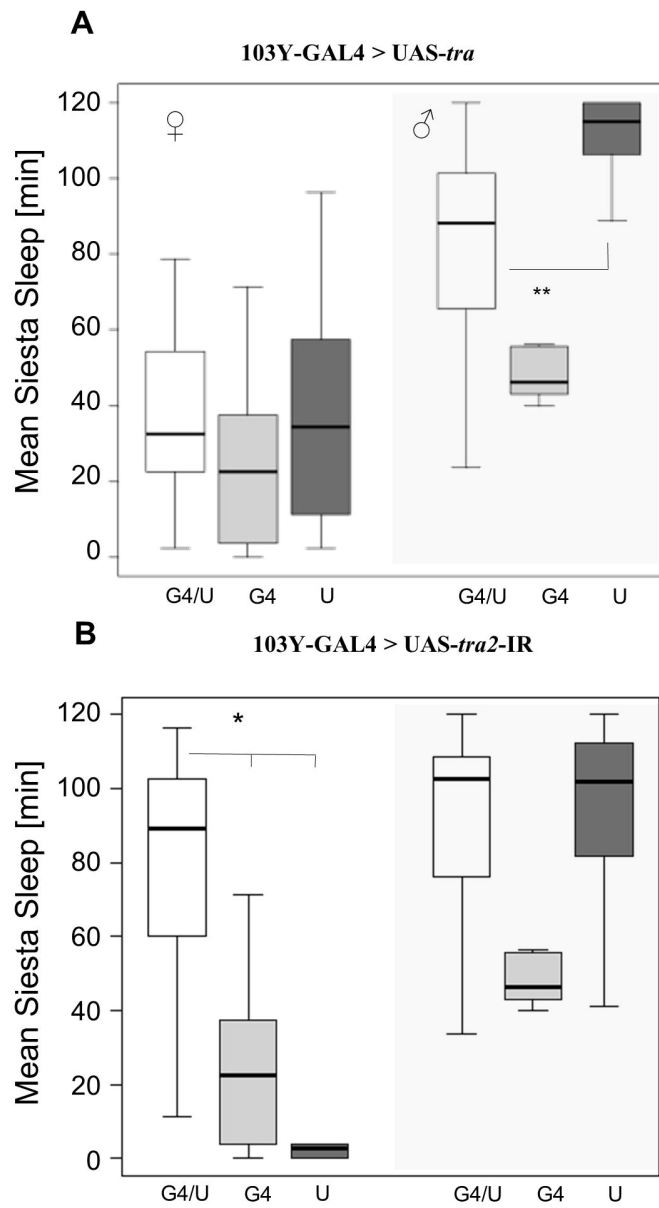

**Fig. 4.**

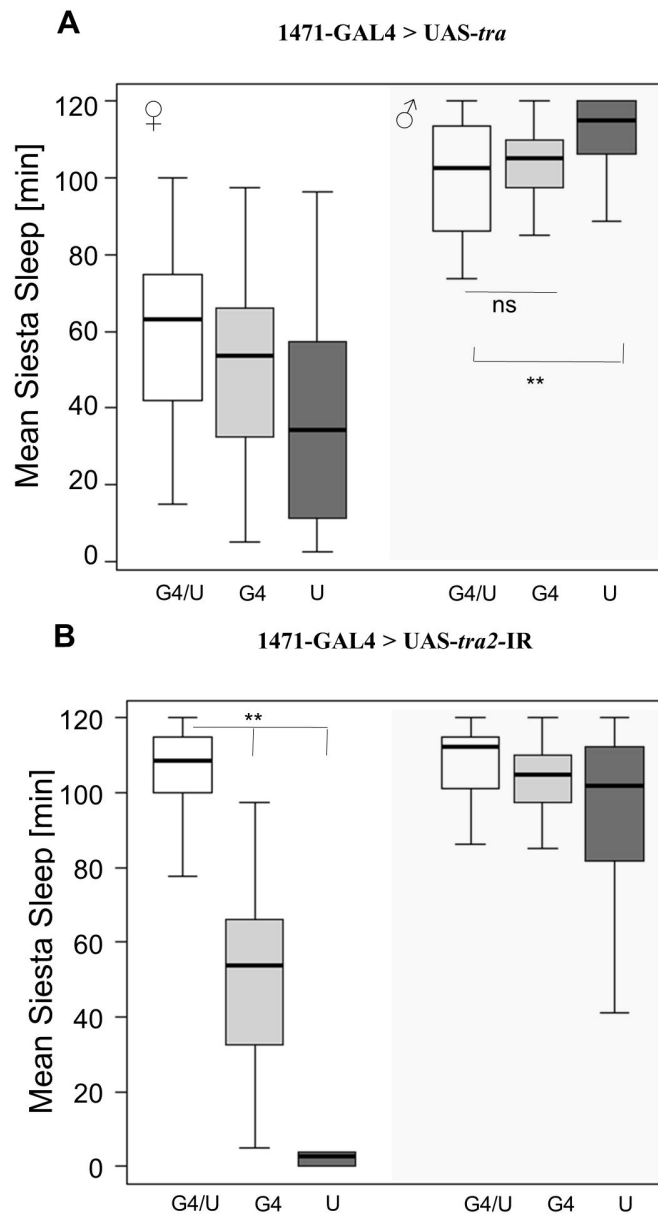

**Fig. 5.**

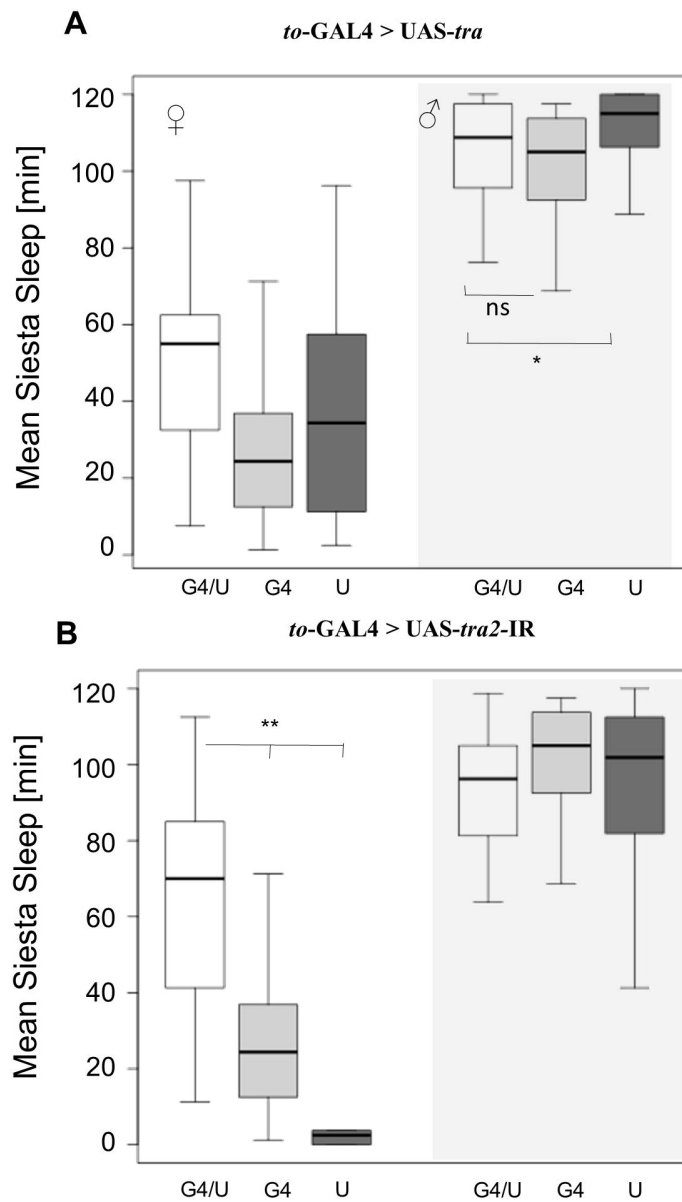



Fig. 6.

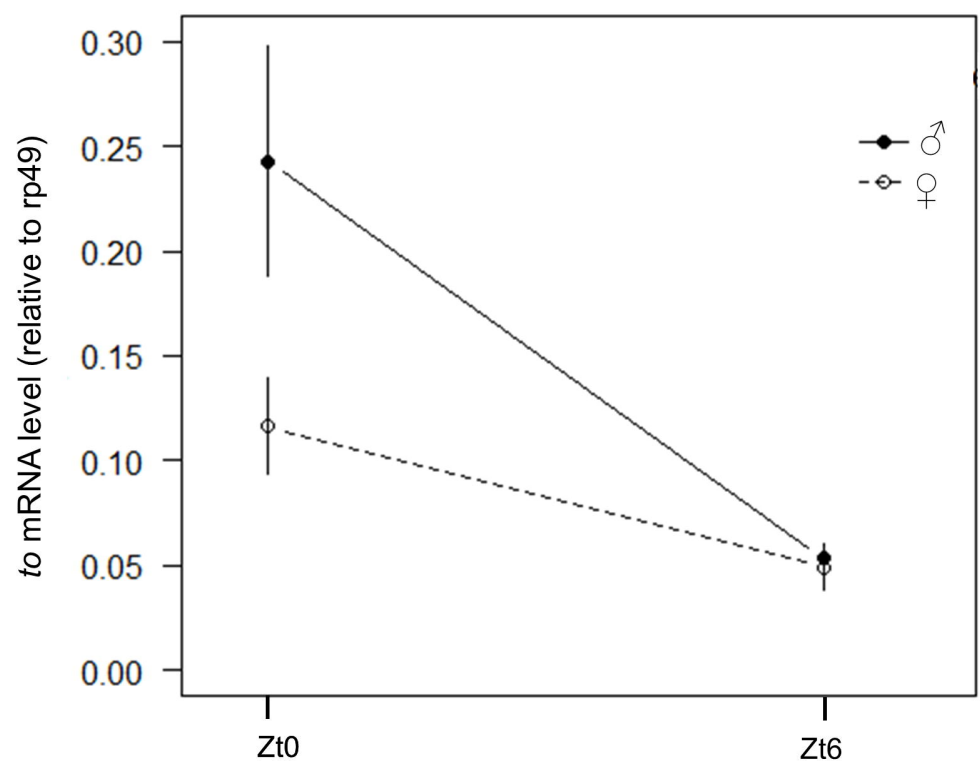

Source: http://biorxiv.org/content/10.1101/027847v2.full.pdf
